# Supplementary material for: First application of the HETPHEN concept to new heteroleptic bis(diimine) copper(i) complexes as sensitizers in dye sensitized solar cells
Source: Royal Society of Chemistry journal article supplement (doi:10.1039/c3dt50852h), 2013-01-01
Supplement: c3dt50852h.pdf [file c3dt50852h.pdf]

## **Electronic Supplementary Information for**

### **First Application of the HETPHEN Concept to New Heteroleptic Bis(diimine) Copper(I) Complexes as Sensitisers in Dye Sensitized Solar Cells**

Martina Sandroni, Megumi Kayanuma, Aurélien Planchat, Nadine Szuwarski, Errol Blart, Yann Pellegrin, Chantal Daniel, Mohammed Boujtita, Fabrice Odobel.

**Hydrogen nuclei numbering for  $^1\text{H}$ -NMR spectra assignment:**

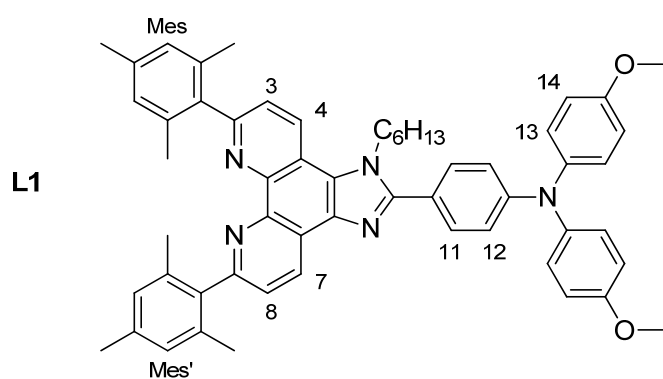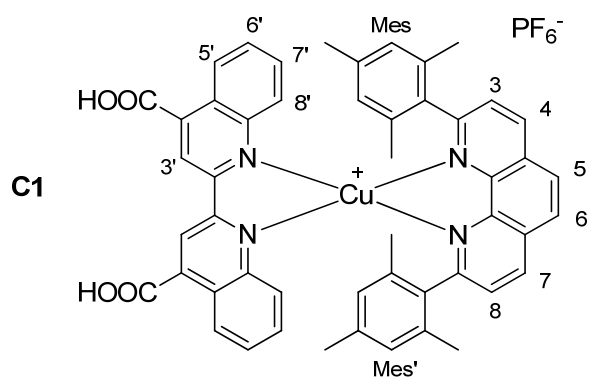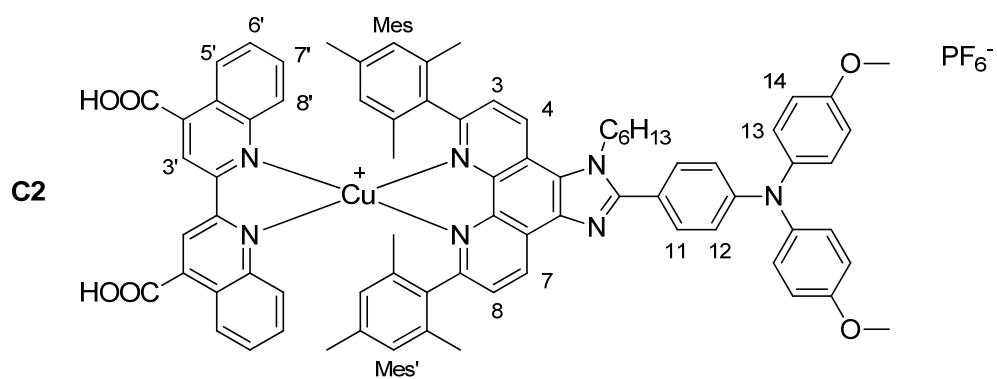

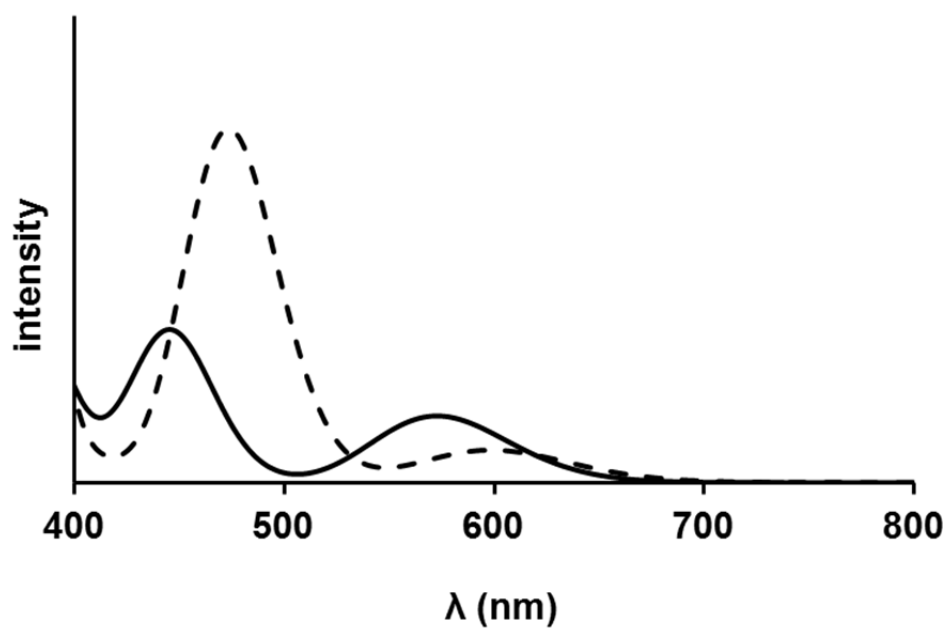

**Figure S1.** Simulated spectra for complexes **C1** (plain line) and **C2** (dashed line).

| Complex   | State                                                    | $\Delta E$ (nm) | F    |
|-----------|----------------------------------------------------------|-----------------|------|
| <b>C1</b> | MLCT <sub>L</sub>                                        | 562             | 0.03 |
|           | MLCT <sub>L</sub> /MLCT <sub>phen</sub>                  | 440             | 0.06 |
|           | MLCT <sub>L</sub> /MLCT <sub>phen</sub>                  | 372             | 0.04 |
|           | MLCT <sub>L</sub>                                        | 369             | 0.03 |
|           | MLCT <sub>L</sub> /IL <sub>L</sub>                       | 342             | 0.08 |
|           | LLCT <sub>L</sub> /MLCT <sub>L</sub>                     | 334             | 0.07 |
|           | IL <sub>L</sub> /LLCT <sub>L</sub>                       | 315             | 0.09 |
|           | IL <sub>L</sub> /LLCT <sub>L</sub> /MLCT <sub>L</sub>    | 311             | 0.03 |
|           | MLCT <sub>phen</sub> /IL <sub>phen</sub>                 | 308             | 0.13 |
|           | IL <sub>phen</sub> /MLCT <sub>L</sub>                    | 306             | 0.04 |
|           |                                                          |                 |      |
| <b>C2</b> | MLCT <sub>L</sub>                                        | 472             | 0.16 |
|           | IL <sub>phen</sub> /MLCT <sub>phen</sub>                 | 395             | 0.17 |
|           | IL <sub>phen</sub>                                       | 361             | 0.70 |
|           | LLCT <sub>L</sub> /IL <sub>L</sub>                       | 341             | 0.08 |
|           | MLCT <sub>phen</sub> /LLCT <sub>L</sub>                  | 337             | 0.07 |
|           | MLCT <sub>phen</sub> /MLCT <sub>L</sub>                  | 327             | 0.10 |
|           | MLCT <sub>phen</sub> /LLCT <sub>L</sub> /IL <sub>L</sub> | 327             | 0.15 |
|           | LLCT <sub>L</sub> /IL <sub>L</sub>                       | 321             | 0.05 |
|           | IL <sub>phen</sub> /MLCT <sub>phen</sub>                 | 319             | 0.63 |
|           |                                                          |                 |      |
|           | MLCT <sub>phen</sub>                                     | 305             | 0.03 |

**Table S1.** Calculated UV-Visible transitions for complexes **C1** and **C2**. “L” denotes the anchoring dcbqH<sub>2</sub> ligand, while “phen” denotes the mesityl bearing phenanthroline ligand.

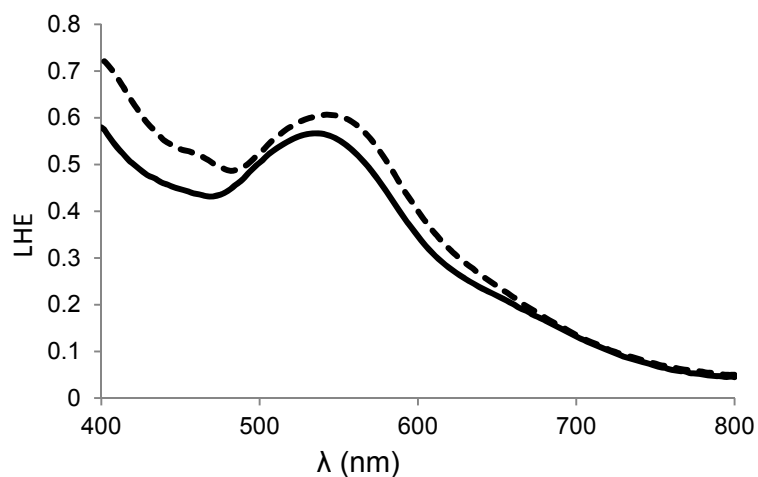

**Figure S2.** LHE of  $\text{TiO}_2$  photo-electrodes sensitized by **C1** (plain line) and **C2** (dashed line).

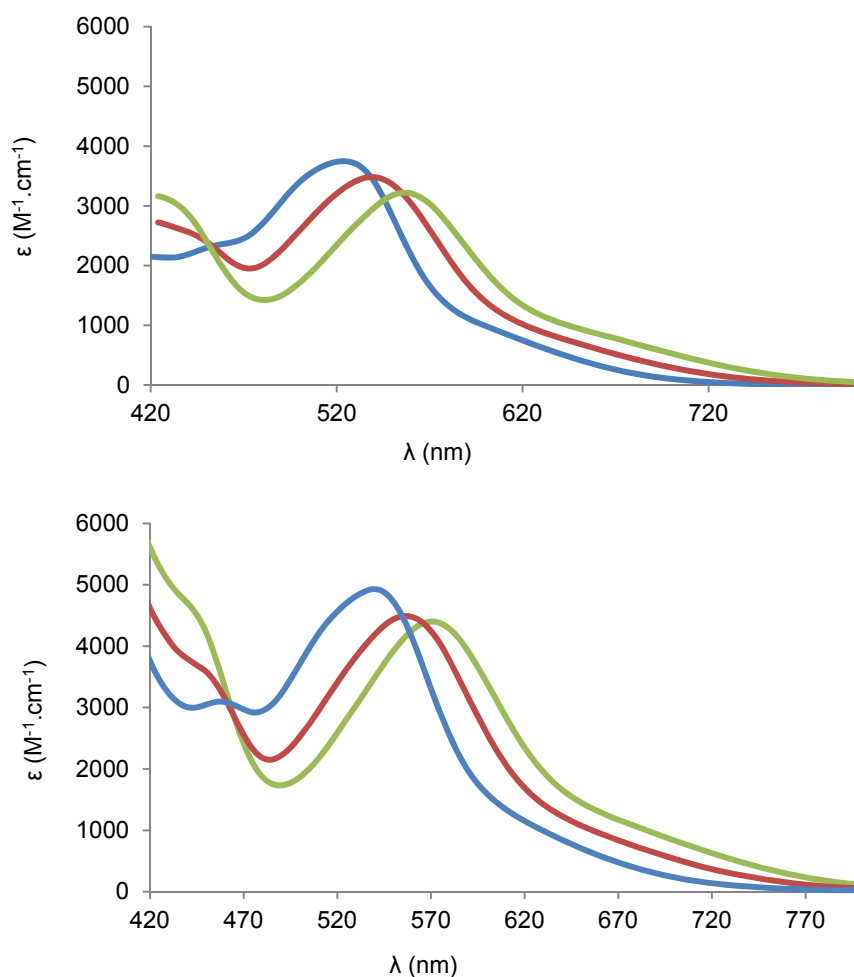

**Figure S3.** Evolution of the electronic absorption spectra of **C1** in methanol and **C2** with the protonation state of  $\text{dcbqH}_2$ : **Cn** (green), **Cn-H** (red) and **Cn.2H** (blue) with  $n = 1$  or  $2$ .

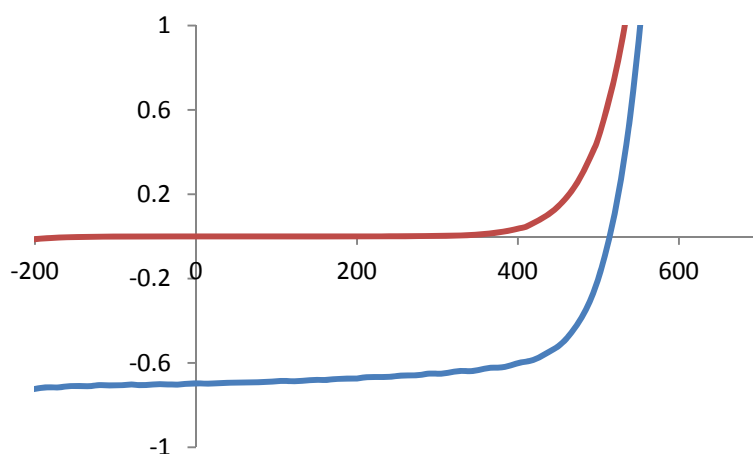

**Figure S4.** J vs. V characteristic of DSSC where  $\text{TiO}_2$  is sensitized by **C1<sub>H</sub>**, and the electrolyte composition is: 0.25 M tert-butylpyridine. Parameters are:  $J_{sc} = 0.70 \text{ mA/cm}^2$ ,  $V_{oc} = 515 \text{ mV}$ ,  $FF = 68.3\%$  and  $\eta = 0.25\%$
